# Supplementary material
Source: PubMed Central journal article supplement (PMC9682349)
Supplement: mmc1.pdf [file mmc1.pdf]

**Supplemental information**

**Beneficial effects of CCL8 inhibition  
at lipopolysaccharide-induced lung injury**

**Asieh Naderi, Elena Farmaki, Bernardo Chavez, Chao Cai, Vimala Kaza, Youwen  
Zhang, Elham Soltanmohammadi, Nina Daneshvar, Ioulia  
Chatzistamou, and Hippokratis Kiaris**

## **Supplemental information**

### **Beneficial effects of CCL8 inhibition at LPS-induced lung injury**

Asieh Naderi, Elena Farmaki, Bernardo Chavez, Chao Cai, Vimala Kaza, Youwen Zhang, Elham Soltanmohammadi, Nina Daneshvar, Ioulia Chatzistamou, and Hippokratis Kiaris

**Figure S1. Hybridoma sequencing, Related to Figure 2.** Antibody fragments of VH and VL were amplified according to standard procedures using RACE (GenScript). The following sequences were obtained.

### **Hybridoma sequencing**

#### **Heavy chain: DNA sequence**

Leader sequence-FR1-CDR1-FR2-CDR2-FR3-CDR3-FR4

ATGGAATGTAAGTGGATACTTCCTTTTATTCTGTCGGTAATTTTCAGGGGTCTACTCA  
GAGGTTTCAGCTCCAGCAGTCTGGGACTGTGCTGGCAAGGCCTGGGGCTTCCGTG  
AAGATGTCCTGTAAGGCTTCTGGCTACAGCTTTACCAGCTACTGGATGCACTGGGT  
CAAACAGAGGCCTGGACAGGGTCTGGAATGGATTGGTGTATTTATCCTGGAAATA  
GTGATAGTGGTACAATAAGAAGTTCAAGGGCAAGGCCAAACTGACTGCAGTCAC  
TTCCGCCAGCACTGCCTACATGGAGCTCAGCAGCTTGACAAATGAGGACTCTGCG  
GTCTATTACTGTTCCCATACAGCCTGGTTTGTGTTACTGGGGCCAAGGGACTCTGGT  
CACTGTCTCTGCA

#### **Heavy chain: Amino acids sequence**

Leader sequence-FR1-CDR1-FR2-CDR2-FR3-CDR3-FR4

MECNWILPFILSVISGVYSEVQLQQSGTVLARPASVKMSCKASGYSFTSYWMHWK  
QRPQGQLEWIGAIYPGNSDSGYNKKFKGKAKLTAVTSASTAYMELSSLTNEDSAIVYC  
SHTAWFVYWGQGLVTVSA

#### **Light chain 1: DNA sequence**

Leader sequence-FR1-CDR1-FR2-CDR2-FR3-CDR3-FR4

ATGATGAGTCCTGCCAGTTCCTGTTTCTGTTAGTGCTCTGGATTCGGGAAACCAA  
CGGTGATGTTGTGATGACCCAGACTCCACTCACTTTGTTCGGTTACCATTGGACAAC  
CAGCCTCCATCTCTTGCAAGTCAAGTCAGAGCCTCTTAGATAGTGATGGAAGGACA  
TATTTGAATTGGTTGTTACAGAGGCCAGGCCAGTCTCAAAGCGCCTAATCTATCT  
GGTGTCTAAACTGGACTCTGGAGTCCCTGACAGGTTCACTGGCAGTGGATCAGGG  
ACAGATTTACACTGAAAATCAGCAGAGTGGAGGCTGAGGATTTGGGAGTTTATTA  
TTGCTGGCAAGGTGCACATTTTCCTCAGACGTTTCGGTGGAGGCACCAAGCTGGAA  
ATCAAA

#### **Light chain 1: Amino acids sequence**

Leader sequence-FR1-CDR1-FR2-CDR2-FR3-CDR3-FR4

MMSPAQFLFLLVLWIRETNQDVVMTQTPLTSLVTIGQPASISCKSSQSLLDSDGRTYLN  
WLLQRPGQSPKRLIYLVSKLDSGVPDRFTGSGSGTDFTLKISRVEAEDLGVYYCWQG  
AHFPQTFGGGKLEIK

#### **Light chain 2: DNA sequence**

Leader sequence-FR1-CDR1-FR2-CDR2-FR3-CDR3-FR4

ATGAGGTTCCAGGTTCCAGGTTCTGGGGCTCCTTCTGCTCTGGATATCAGGTGCC  
AGTGTGATGTCCAGATAACCCAGTCTCCATCTTATCTTGCTGCATCTCCTGGAGAA  
ACCATTACTTTTAATTGCAGGGCAAGTAAGAGCATTAGCAAATATTTTCGCCTGGTAT  
CAAGAGAAACCTGGGAAAATAAAGCTTCTTATCTACTCTGGATCCACTTTGCAA  
TCTGGAATTCCATCAAGGTTCAAGTGGCAGTGGATCTGGTACAGATTTCAATCTCAC  
CATCAGTAGCCTGGAGCCTGAAGATTTTGCAATGTATTACTGTCAACAGCATAA  
TGAATACCCGCTCACGTTTCGGTGTGGGACCAAGCTGGAGCTGAAA

**Light chain 2: Amino acids sequence**

Leader sequence-FR1-CDR1-FR2-CDR2-FR3-CDR3-FR4

MRFQVQVLGLLLLWISGAQCDVQITQSPSYLAASPGETITFNCRASKSISKYFAWYQEK  
PGKTNKLLIYSGSTLQSGIPSRFSGSGSGTDFNLTISSLEPEDFAMYQCQHNHEYPLTF  
GAGTKLELK

**Figure S2. Long term effects of 1G3E5 in LPS-induced lung inflammation in deer mice, Related to Figure 6.** Animals received 3 times consecutively LPS every 3 days and were sacrificed 1 month later. 1G3E5 was administered following the administration of LPS. Microphotographs show representative H&E stained sections of the lungs at which prominent immune cell infiltration is seen in the animals that received LPS alone or combined with non-specific IgG. In the animals that received 1G3E5 the effect of LPS was reduced.

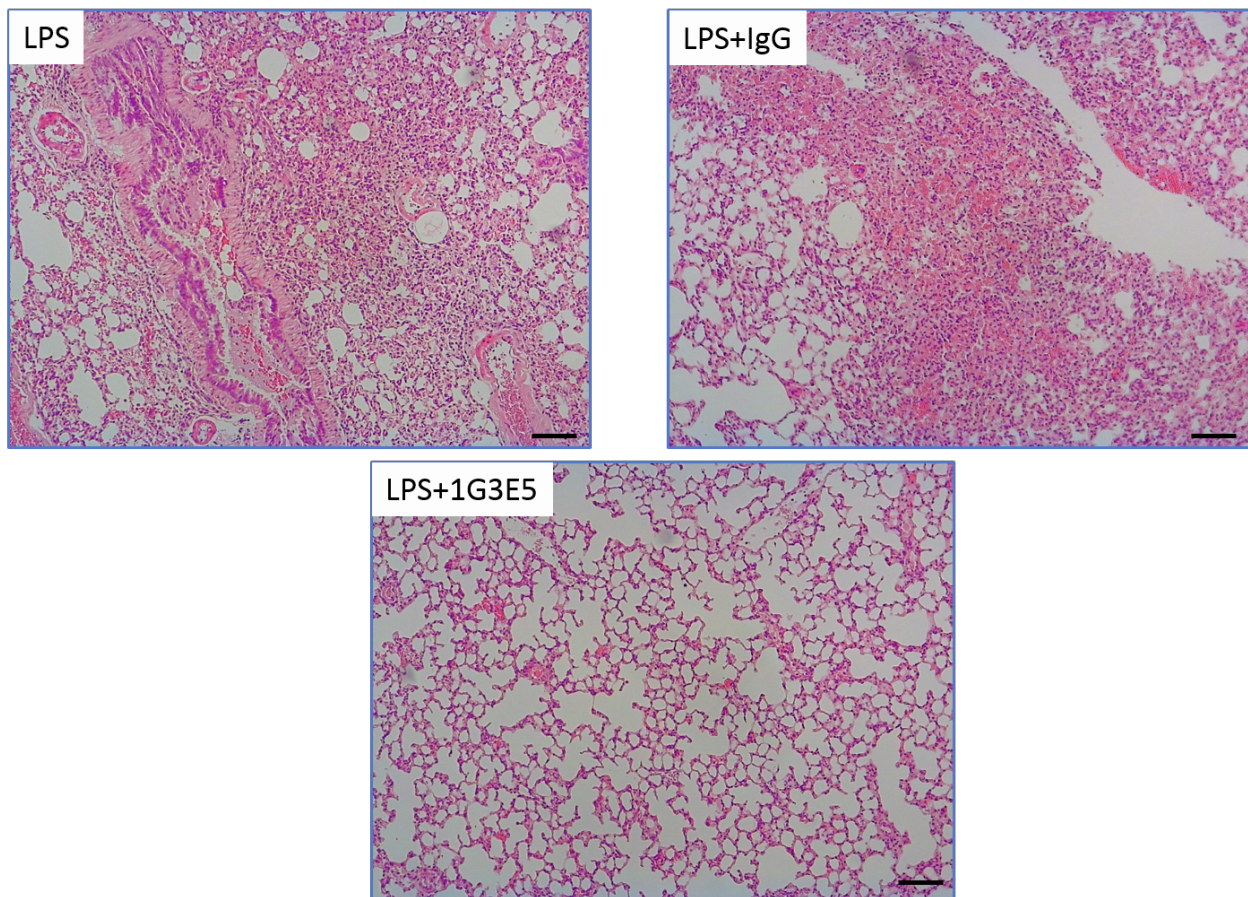

**Table S1. qPCR primers, Related to the STAR Methods.**

| <b>Genes name</b>                 | <b>Forward</b>                | <b>Reverse</b>               |
|-----------------------------------|-------------------------------|------------------------------|
| Primers for <i>P. maniculatus</i> |                               |                              |
| GAPDH                             | 5'-GGAGCCGAGTATGTTGTGGAG-3'   | 5'-GGAGATGATGACCCGTTTGG-3'   |
| IL1 $\beta$                       | 5'-CCAGCAGCATTTCACAAGA-3'     | 5'-CCACGAGCAGATTTTCATCC-3'   |
| IL6                               | 5'-CACCTCTGGTCTTCTGGACT-3'    | 5'-CTCTGAAGGGCTCTGGCTTT-3'   |
| TNF $\alpha$                      | 5'-CTACTTGGGAGGGGTCTTCC-3'    | 5'-CGGATTCTGCGAAGTCTAGG-3'   |
| CCL8                              | 5'-TTGCCTGCTGCTTTTCTGTA-3'    | 5'-AGTGACCCACTTCTGCTTGG-3    |
| CCR1                              | 5'-ACCTGGGTCCTAGCCATCTT-3'    | 5'-CCAAGGAGGTTTCAGCTTCAG-3'  |
| CCR2                              | 5'-ACACCCTGTTTCGCTGTAGG-3'    | 5'-TGATTGGCAACCACACAGTT-3    |
| CCR3                              | 5'-TTCTGTGGACCTCGTTACCC-3'    | 5'-TTTTATTGGGGCATCTCAGC-3'   |
| CCR5                              | 5'-GGGCTCACTATGCTGCAAAT-3'    | 5'-CTTGTCAACACCCCAAAGGT-3'   |
| CCR8                              | 5'-GAAGCTGAGGAGCATTACGG-3'    | 5'-CACATGACAGTCCCGAACAC-3'   |
| Primers for <i>Mus musculus</i>   |                               |                              |
| GAPDH                             | 5'-ACCCAGAAGACTGTGGATGG-3'    | 5'-CACATTGGGGGTAGGAACAC-3'   |
| IL1 $\beta$                       | 5'-GCAACTGTTCCCTGAACTCAACT-3' | 5'-ATCTTTTGGGGTCCGTCAACT-3'  |
| IL6                               | 5'-TAGTCCTTCTACCCCAATTTCC-3'  | 5'-TTGGTCCTTAGCCACTCCTTC-3'  |
| TNF $\alpha$                      | 5'-CAGGCGGTGCCTATGTCTC-3'     | 5'-CGATCACCCCGAAGTTCAGTAG-3' |
